# Supplementary material for: Lactobacillus rhamnosus Ameliorates Multi-Drug-Resistant Bacillus cereus-Induced Cell Damage through Inhibition of NLRP3 Inflammasomes and Apoptosis in Bovine Endometritis
Source: MDPI journal article supplement (doi:10.3390/microorganisms10010137), 2022-01-10
Supplement: s1 [file s1]

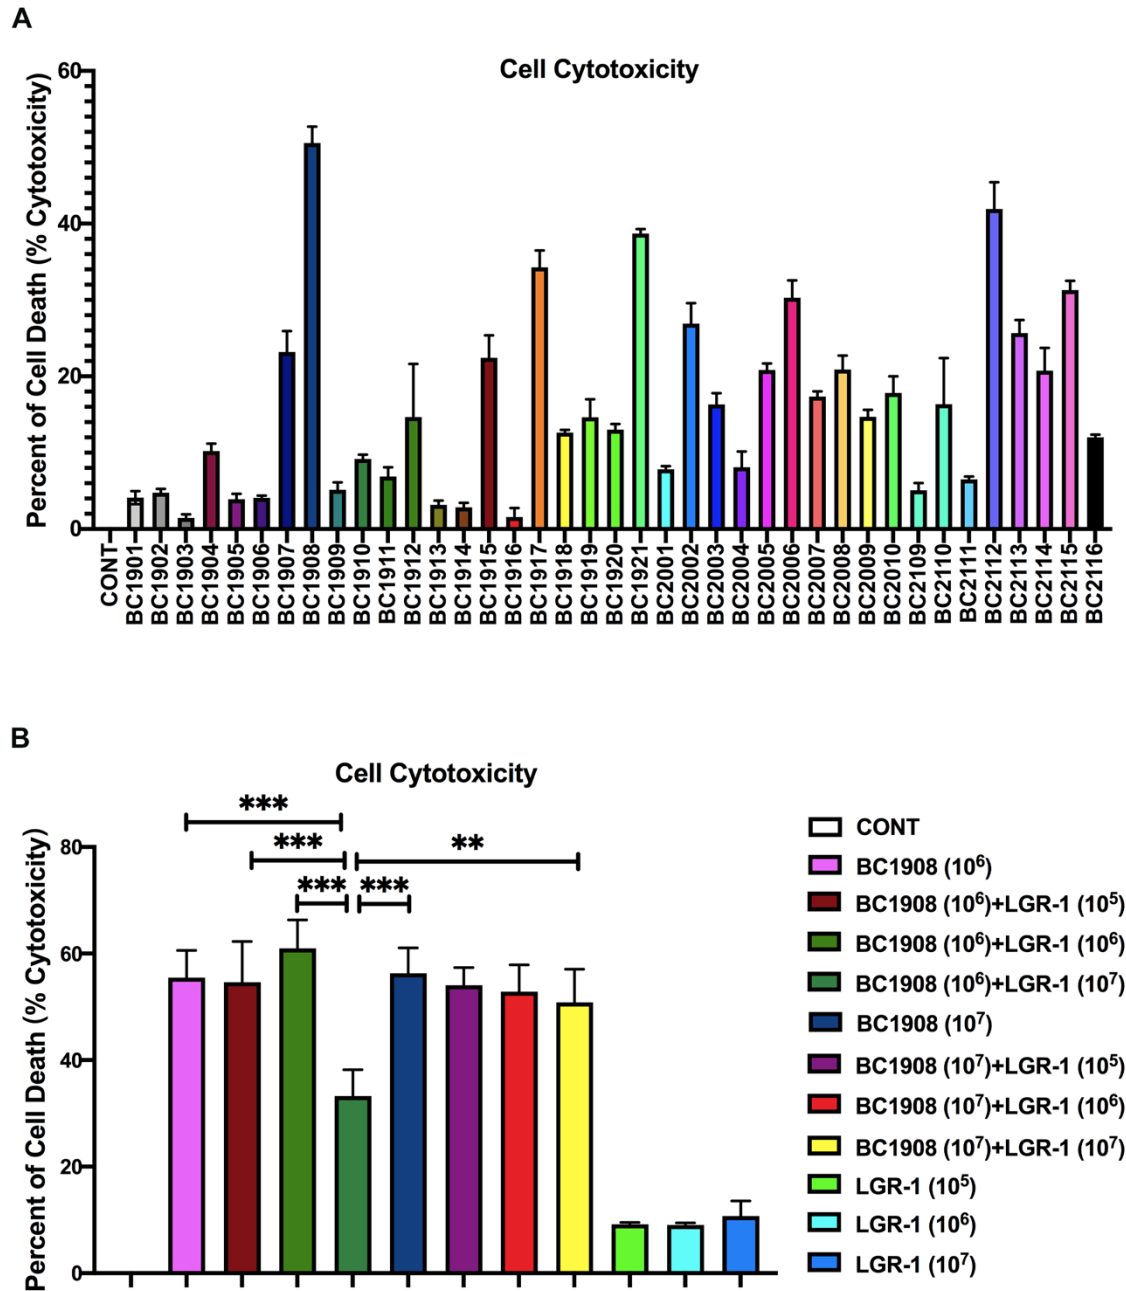

**Supplementary Figure S1.** Explore the cytotoxicity of *B. cereus* and the protective effect of LGR-1 on cells. (A) Toxic effects of *B. cereus* on endometrial epithelial cells after three hours of action. (B) Using different BC1908 concentrations and different LGR-1 concentrations to explore the least protective effect of LGR-1 on *B. cereus*.

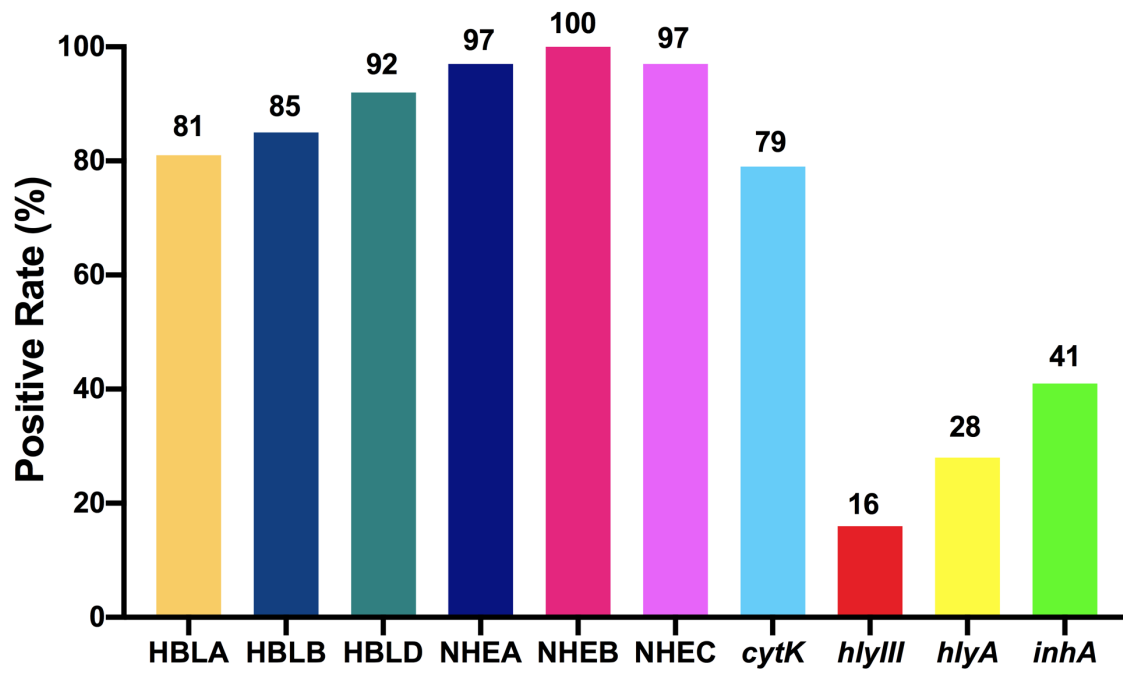

**Supplementary Figure S2.** To explore the virulence gene carrier rate of clinical isolates of *Bacillus cereus*. The numbers above the bar graph represent the positive rates of virulence genes in all clinical isolates of *B. cereus*.
